# Supplementary material for: An Integrated Clinical-Biological Approach to Identify Interindividual Variability and Atypical Phenotype-Genotype Correlations in Myopathies: Experience on A Cohort of 156 Families
Source: MDPI journal article supplement (doi:10.3390/genes12081199), 2021-07-31
Supplement: s1 [file s1]

---

**Table S1: Extended gene panel (n=185) used for NGS study**

---

| <b>Gene list corresponding to the main clinical entry groups</b> | <b>Additional genes associated to other entry diagnostic categories included in the panel</b> |
|------------------------------------------------------------------|-----------------------------------------------------------------------------------------------|
|------------------------------------------------------------------|-----------------------------------------------------------------------------------------------|

---

- |                                                                         |                                                 |
|-------------------------------------------------------------------------|-------------------------------------------------|
| - Nemaline Congenital myopathies                                        | - Alpha-dystroglycanopathies                    |
| - Congenital myopathies excluding nemaline associated genes             | - Metabolic myopathies                          |
| - Distal myopathies                                                     | - Myopathies associated with joint contractures |
| - Myofibrillar myopathies and inclusion body myopathies                 | - Congenital myasthenias                        |
| - Limb-Girdle Muscular Dystrophy                                        | - Non-dystrophic myotonia                       |
| - Congenital Muscular Dystrophies except for alpha-dystroglycanopathies | - Periodic paralysis                            |
|                                                                         | - Fetal and neonatal arthrogryposes             |
|                                                                         | - Other myopathies                              |

(official gene symbols approved by the HGNC) in red genes added during NGS panel update from 135 to 185 genes.

|                |                 |
|----------------|-----------------|
| <i>ACAD9</i>   | <i>ABHD5</i>    |
| <i>ACTA1</i>   | <i>ACADVL</i>   |
| <i>ADSSL1</i>  | <i>ADGRG1</i>   |
| <i>ANO5</i>    | <i>AGL</i>      |
| <i>BAG3</i>    | <i>AGRN</i>     |
| <i>BIN1</i>    | <i>ALG14</i>    |
| <i>BVES</i>    | <i>ALG13</i>    |
| <i>CACNA1S</i> | <i>ALG2</i>     |
| <i>CAPN3</i>   | <i>AMPD1</i>    |
| <i>CASQ1</i>   | <i>ATP2A1</i>   |
| <i>CAV3</i>    | <i>B3GALNT2</i> |
| <i>CCDC78</i>  | <i>B4GAT1</i>   |
| <i>CFL2</i>    | <i>CACNA1A</i>  |
| <i>CHKB</i>    | <i>CAVIN1</i>   |
| <i>CNTN1</i>   | <i>CHAT</i>     |
| <i>COL12A1</i> | <i>CHRNA1</i>   |
| <i>COL6A1</i>  | <i>CHRNA1</i>   |
| <i>COL6A2</i>  | <i>CHRNA1</i>   |
| <i>COL6A3</i>  | <i>CHRNA1</i>   |
| <i>CRYAB</i>   | <i>CHRNA1</i>   |
| <i>DAG1</i>    | <i>CHRNA1</i>   |
| <i>DES</i>     | <i>CHRNA1</i>   |
| <i>DMD</i>     | <i>CHRNA1</i>   |
| <i>DNAJB6</i>  | <i>CHRNA1</i>   |
| <i>DNM2</i>    | <i>CHRNA1</i>   |

---

---

|         |        |
|---------|--------|
| DPM3    | CPT2   |
| DYSF    | DOK7   |
| FLAD1   | DOLK   |
| FHL1    | DPAGT1 |
| FKRP    | DPM1   |
| FKTN    | DPM2   |
| FLNC    | ECEL1  |
| GAA     | EMD    |
| GMPPB   | ENO3   |
| GNE     | ETFA   |
| GOLGA2  | ETFB   |
| HACD1   | ETFDH  |
| HNRNPA1 | FBN2   |
| HNRNPDL | GBE1   |
| ISPD    | GFPT1  |
| ITGA7   | GYG1   |
| KBTD13  | GYS1   |
| KLHL40  | HSPG2  |
| KLHL41  | ISCU   |
| KLHL9   | KCNA1  |
| KY      | KCNE3  |
| LAMA2   | KCNJ18 |
| LDB3    | KCNJ2  |
| LIMS2   | LAMB2  |
| LMNA    | LAMP2  |
| LMOD3   | LDHA   |
| MATR3   | LARGE1 |
| MEGF10  | LARGE2 |
| MTM1    | LPIN1  |
| MYBPC3  | LRP4   |
| MYH2    | MUSK   |
| MYH7    | MYH3   |
| MYO18B  | MYH8   |
| MYOT    | MYO9A  |
| MYPN    | NALCN  |
| NEB     | NEK5   |
| ORAI1   | PABPN1 |
| PLEC    | PFKM   |
| PNPLA2  | PIEZO2 |
| POMGNT1 | PGAM2  |
| POMT1   | PGK1   |
| POMT2   | PGM1   |
| PYROXD1 | PHKA1  |
| RYR1    | PHKB   |

---

---

|          |          |
|----------|----------|
| SELENON  | PNPLA8   |
| SGCA     | POMGNT2  |
| SGCB     | POMK     |
| SGCD     | PREPL    |
| SGCG     | PRKAG2   |
| SPEG     | PYGM     |
| SQSTM1   | RAPSN    |
| STAC3    | RBCK1    |
| STIM1    | SCN4A    |
| TCAP     | SLC22A5  |
| TIA1     | SLC25A1  |
| TNNT1    | SLC25A20 |
| TNPO3    | SLC25A32 |
| TOR1AIP1 | SLC35A1  |
| TPM2     | SLC35A2  |
| TPM3     | SLC5A7   |
| TRAPPC11 | SNAP25   |
| TRIM32   | SYT2     |
| TRIM54   | TMEM5    |
| TRIM63   | TNNI2    |
| TRIP4    | TNNT3    |
| TTN      | TUBB2b   |
| VCP      | VMA21    |
|          | ZC4H2    |

---
