# Supplementary material for: An Integrated Clinical-Biological Approach to Identify Interindividual Variability and Atypical Phenotype-Genotype Correlations in Myopathies: Experience on A Cohort of 156 Families
Source: MDPI journal article supplement (doi:10.3390/genes12081199), 2021-07-31
Supplement: s1 [file s1]

Table S2: Detailed list of pathogenic, likely or possibly pathogenic variants

| Patient | Gender, Age | Gene                   | Pathogenic variants                    | Variant type     | Familial segregation                    | Familial data                    | ExAC/ gnomAD             | SIFT/ Polyphen 2              | MPA score                                                    | CADD                                                     | Splice AI                                               | ACMG Class           | Clinical features                                  | CK                             | Muscle biopsy                                         |
|---------|-------------|------------------------|----------------------------------------|------------------|-----------------------------------------|----------------------------------|--------------------------|-------------------------------|--------------------------------------------------------------|----------------------------------------------------------|---------------------------------------------------------|----------------------|----------------------------------------------------|--------------------------------|-------------------------------------------------------|
| I15     | M, 4y       | ACTA1<br>NM_001100.3   | c.493G>C<br>p.(Val165Leu)              | Missense         | De novo variant                         | Sporadic                         | Absent                   | S : -<br>P : D<br>(0.93)      | 7.7                                                          | 4,127                                                    | AG: 0 (-3)<br>AL: 0 (38)<br>DG: 0 (-8)<br>DL: 0 (1)     | 5                    | Severe neonatal hypotonia with respiratory failure | x2                             | Non-specific myopathic changes                        |
| I2      | M, <1y      | ACTA1                  | c.449C>T<br>p.(Thr150Ile)              | Missense         | Parents not tested                      | Sporadic                         | Absent                   | S : -<br>P : B<br>(0.38)      | 9                                                            | 3,368                                                    | AG: 0 (31)<br>AL: 0 (48)<br>DG: 0 (-5)<br>DL: 0 (48)    | 4                    | Severe neonatal hypotonia with arthrogryposis      | NI                             | Non-specific myopathic changes                        |
| I100    | M, <1y      | ACTA1                  | c.1057A>G<br>p.(Thr353Ala)             | Missense         | Parents not tested                      | Sporadic                         | Absent                   | S : -<br>P : D<br>(0.91)      | 9                                                            | 3,93                                                     | AG: 0 (36)<br>AL: 0 (-12)<br>DG: 0 (5)<br>DL: 0 (37)    | 4                    | Severe neonatal hypotonia with respiratory failure | NI                             | Non-specific myopathic changes                        |
| I135    | M, <1y      | ACTA1                  | c.553C>T<br>p.(Arg185Cys)              | Missense         | De novo variant                         | Sporadic                         | Absent                   | S : -<br>P : D<br>(0.99)      | 10                                                           | 4,574                                                    | AG: 0 (-44)<br>AL: 0 (-27)<br>DG: 0 (2)<br>DL: 0 (-35)  | 5                    | Severe neonatal hypotonia                          | x2                             | Non-specific myopathic changes                        |
| I192    | M, 20y      | ACTA1                  | c.889G>A<br>p.(Ala297Thr)              | Missense         | De novo variant                         | Sporadic                         | Absent                   | S : -<br>P : B<br>(0.07)      | 6.6                                                          | 2,541                                                    | AG: 0 (9)<br>AL: 0 (40)<br>DG: 0 (10)<br>DL: 0 (5)      | 5                    | Asymptomatic CK elevation                          | x20                            | Non-specific myopathic changes                        |
| I32     | F, 40y      | ANO5<br>NM_213599.2    | c.1622_1623insA<br>p.(Met543AsnFs*)    | Frameshift indel | Mother was heterozygous                 | AR<br>(one affected sister)      | 4.37e-05 /<br>3.68e-05   | 10                            | 5,605                                                        | AG: 0 (7)<br>AL: 0 (-17)<br>DG: 0 (6)<br>DL: 0.25 (7)    | 5                                                       | Exercise intolerance | x20                                                | Dystrophic pattern             |                                                       |
|         |             |                        | c.1991T>C<br>p.(Phe664ser)             | Missense         | Father not tested                       |                                  | Absent                   |                               |                                                              | S : T (0.1)<br>P : D<br>(0.97)                           | 6                                                       |                      |                                                    |                                | 3,034                                                 |
| I53     | M, 51y      | ANO5                   | c.656A>G (homozygous)<br>p.(Tyr219Cys) | Missense         | Not tested                              | Sporadic. Familial consanguinity | 8.309e-06 /<br>7.09e-06  | S : D (0.02)<br>P : D (0.99)  | 9                                                            | 4,013                                                    | AG: 0 (-7)<br>AL: 0 (13)<br>DG: 0.01 (45)<br>DL: 0 (-7) | 4                    | LGMD                                               | x20                            | Dystrophic pattern. Normal IHC                        |
| I303    | F, 30y      | CACNA1S<br>NM_000069.2 | c.5104C>T<br>p.(Arg1702*)              | Nonsense         | Father was heterozygous                 | Affected deceased brother        | 9.309e-05 /<br>8.492e-05 | 10                            | 6,754                                                        | AG: 0 (-23)<br>AL: 0 (40)<br>DG: 0 (2)<br>DL: 0.02 (-30) | 5                                                       | Neonatal hypotonia   | NI                                                 | Non-specific myopathic changes |                                                       |
|         |             |                        | c.2970G>A<br>p.(Trp990*)               | Nonsense         | Mother was heterozygous                 |                                  | Absent                   |                               |                                                              | 10                                                       | 9,326                                                   |                      |                                                    |                                | AG: 0 (-9)<br>AL: 0 (41)<br>DG: 0.79 (4)<br>DL: 0 (0) |
| I164    | M,20y       | CACNA1S                | c.2447T>G<br>p.(Leu816Arg)             | Missense         | Present in his pauci-symptomatic father | AD                               | Absent                   | S : D (0.0)<br>P : D (0.99)   | 10                                                           | 3,232                                                    | AG: 0 (50)<br>AL: 0 (8)<br>DG: 0 (-40)<br>DL: 0 (-43)   | 4                    | Neonatal hypotonia                                 | NI                             | Non-specific myopathic changes                        |
| I43     | F, 36y      | CAPN3<br>NM_000070.2   | c.1250C>T<br>p.(Thr417Met)             | Missense         | Parents not tested                      | Sporadic                         | 4.95e-05 /<br>4,95e-05   | S : D (0.017)<br>P : D (0.99) | 9                                                            | 4,084                                                    | AG: 0 (17)<br>AL: 0 (-19)<br>DG: 0 (40)<br>DL: 0 (42)   | 4                    | LGMD                                               | x20                            | Dystrophic pattern. Normal IHC                        |
|         |             |                        | c.1536+3A>G                            | Splicing         | Absent                                  |                                  | 10                       | 2,852                         | AG: 0.04 (-14)<br>AL: 0 (-3)<br>DG: 0 (-15)<br>DL: 0.27 (-3) | 4                                                        |                                                         |                      |                                                    |                                |                                                       |

|               |                |                           |                                            |                   |                                                        |                                          |                         |                                      |    |       |                                                                |   |                                                          |     |                                                                                  |
|---------------|----------------|---------------------------|--------------------------------------------|-------------------|--------------------------------------------------------|------------------------------------------|-------------------------|--------------------------------------|----|-------|----------------------------------------------------------------|---|----------------------------------------------------------|-----|----------------------------------------------------------------------------------|
| I219          | M, 23 y        | CAPN3                     | c.1469G>A<br>(homozygous)<br>p.(Arg490Gln) | Missense          | Not tested                                             | Sporadic                                 | 5,95e-05/<br>6,725e-05  | S : D<br>(0.01)<br>P : D (1)         | 8  | 4,12  | AG: 0 (2)<br>AL: 0 (-32)<br>DG: 0 (-44)<br>DL: 0 (19)          | 4 | LGMD                                                     | x10 | Dystrophic<br>pattern.<br>Normal IHC                                             |
| I144,<br>I148 | F,9y<br>M, 40y | COL6A1<br>NM_001848<br>.2 | c.299_428+152delinsGA<br>CAGGA             | CNV               | Affected<br>brother and<br>father were<br>heterozygous | AD                                       | Absent                  | S: D (0)<br>P: D<br>(0.99)           | 10 | NA    | NA                                                             | 5 | CM with early<br>joint<br>contractures                   | x2  | Non-specific<br>myopathic<br>changes                                             |
| I269          | F, 36y         | COL6A1                    | c.806G>A<br>p.(Gly269Glu)                  | Missense          | <i>De novo</i> variant                                 | Sporadic                                 | Absent                  | S : D (0)<br>P : D<br>(0.99)         | 10 | 4,685 | AG: 0.55 (3)<br>AL: 0 (9)<br>DG: 0 (3)<br>DL: 0 (8)            | 4 | CM with<br>contractures<br>and<br>respiratory<br>failure | UNK | Dystrophic<br>pattern                                                            |
| I65           | M, 10y         | COL6A1                    | c.739-1G>A                                 | Splicing          | Present in<br>affected father                          | AD                                       | Absent                  |                                      | 10 | 5,196 | AG: 0.48<br>(22)<br>AL: 1 (1)<br>DG: 0 (-50)<br>DL: 0 (21)     | 5 | CM with<br>contractures                                  | NI  | Not done                                                                         |
| I93           | M, 10y         | COL6A2<br>NM_001849<br>.3 | c.403G>A<br>p.(Asp135Asn)                  | Missense          | Present in<br>mother                                   | Sporadic                                 | Absent/<br>4e-06        | S : D (0)<br>P : D<br>(0.98)         | 10 | 4,049 | AG: 0 (30)<br>AL: 0 (-33)<br>DG: 0 (3)<br>DL: 0 (22)           | 4 | LGMD with<br>contractures                                | x5  | Dystrophic<br>pattern                                                            |
|               |                |                           | c.2905G>A<br>p.(Val969Met)                 | Missense          | Present in<br>father                                   |                                          | 1.702e-05/<br>2e-06     | S : D<br>(0.007)<br>P : D<br>(0.983) | 9  | 3,592 | AG: 0 (29)<br>AL: 0 (-3)<br>DG: 0 (2)<br>DL: 0 (-1)            | 4 |                                                          |     |                                                                                  |
| I429          | M, 20y         | COL6A3<br>NM_004369<br>.3 | c.6170A>G<br>p.(Glu2057Gly)                | Missense          | Not tested                                             | Sporadic                                 | Absent                  | S : T<br>(0.082)<br>P : D<br>(0.974) | 8  | 2,928 | AG: 0 (36)<br>AL: 0 (13)<br>DG: 0 (-44)<br>DL: 0 (-40)         | 4 | LGMD                                                     | x3  | Not done                                                                         |
| I542          | M, 4y          | COL6A3                    | c.6230G>T<br>p.(Gly2077Val)                | Missense          | <i>De novo</i> variant                                 | Sporadic                                 | Absent                  | S : D (0)<br>P : D (1)               | 10 | 4,371 | AG: 0 (-18)<br>AL: 0 (49)<br>DG: 0 (19)<br>DL: 0 (1)           | 4 | CM                                                       | NI  | Non-specific<br>myopathic<br>changes                                             |
| I58           | F, 35y         | COL6A3                    | c.5035G>T<br>p.(Gly1679Trp)                | Missense          | Present in<br>affected<br>mother, uncle<br>and cousin  | AD                                       | Absent                  | S : D (0)<br>P : D (1)               | 10 | 4,116 | AG: 0 (-12)<br>AL: 0 (-48)<br>DG: 0 (2)<br>DL: 0 (4)           | 4 | LGMD with<br>retractions                                 |     | Non-specific<br>myopathic<br>changes                                             |
| I287          | F, 16y         | DMD<br>NM_004006<br>.2    | del <45-51><br>(heterozygous)              | CNV :<br>Deletion | Present in<br>mother                                   | Sporadic                                 |                         |                                      |    | NA    | NA                                                             | 5 | Asymptomatic<br>elevation of<br>CK                       | x10 | Not done                                                                         |
| I56           | F, 45Y         | DMD                       | c.2665C>T<br>p.(Arg889*)                   | Nonsense          | Mother was<br>heterozygous                             | X-linked<br>The mother<br>had high<br>CK | Absent                  |                                      | 10 | 6,71  | AG: 0 (49)<br>AL: 0.01<br>(42)<br>DG: 0 (42)<br>DL: 0 (4)      | 5 | LGMD                                                     | x10 | Dystrophic<br>pattern.<br>IHC studies<br>not done                                |
| I12           | F, 61 y        | DYSF<br>NM_003494<br>.3   | c.1168G>A<br>p.(Asp390Asn)                 | Missense          | Affected<br>brother<br>carrying the<br>same variants.  | AR                                       | Absent/<br>7.981e-06    | S : D (0)<br>P : D (0.9)             | 8  | 3,87  | AG: 0 (-16)<br>AL: 0 (-50)<br>DG: 0.08 (-<br>16)<br>DL: 0 (33) | 4 | LGMD                                                     | x10 | Dystrophic<br>pattern.<br>IHC:<br>Absence of<br>dysferlin<br>staining            |
|               |                |                           | c.5302C>T<br>p.(Arg1768Trp)                | Missense          | Parents not<br>tested                                  |                                          | 10.62e-06/<br>8.283e-06 | S : D (0)<br>P : D (1)               | 9  | 4,429 | AG: 0 (14)<br>AL: 0 (-30)<br>DG: 0 (42)<br>DL: 0 (38)          | 4 |                                                          |     |                                                                                  |
| I16           | M, 68y         | DYSF                      | c.755C>T<br>p.(Thr252Met)                  | Missense          | Parents not<br>tested                                  | AR<br>(one<br>affected<br>sister)        | Absent/<br>11.93e-06    | S : D (0)<br>P : D (1)               | 10 | 3,583 | AG: 0 (-28)<br>AL: 0 (-15)<br>DG: 0 (37)<br>DL: 0 (40)         | 4 | LGMD                                                     | x2  | Dystrophic<br>pattern.<br>IHC of<br>dysferlin on<br>muscle<br>biopsy<br>not done |
|               |                |                           | c.3118C>T<br>p.(Arg1040Trp)                | Missense          |                                                        |                                          | Absent                  | S : D (0)<br>P : D<br>(0.99)         | 10 | 4,146 | AG: 0 (-10)<br>AL: 0 (-48)<br>DG: 0 (-20)<br>DL: 0 (8)         | 4 |                                                          |     |                                                                                  |
| I111          | F, 4y          | FLNC<br>NM_001458<br>.4   | c.4927+2T>A                                | Splicing          | <i>De novo</i> variant                                 | Sporadic                                 | Absent                  |                                      | 10 | 5,384 | AG: 0 (2)<br>AL: 0 (-18)<br>DG: 0.03 (2)<br>DL: 0.99 (-<br>2)  | 4 | CM with<br>restrictive<br>cardiomyopath<br>y             | NI  | Non-specific<br>myopathic<br>changes                                             |

|      |        |                      |                                            |                  |                                     |                                    |                         |                                      |    |       |                                                             |   |                                                           |     |                                                                |
|------|--------|----------------------|--------------------------------------------|------------------|-------------------------------------|------------------------------------|-------------------------|--------------------------------------|----|-------|-------------------------------------------------------------|---|-----------------------------------------------------------|-----|----------------------------------------------------------------|
| I298 | M, 38y | FLNC                 | c.3557C>T<br>p.(Ala1186Val)                | Missense         | <i>De novo</i> variant              | Sporadic                           | Absent                  | S : D<br>(0.001)<br>P : D (0.8)      | 9  | 3,452 | AG: 0 (41)<br>AL: 0 (-12)<br>DG: 0.01 (-50)<br>DL: 0 (46)   | 4 | Myopathy with contractures and early onset cardiomyopathy | UNK | Cytoplasmic bodies                                             |
| I202 | M, <1y | FKRP<br>NM_024301.4  | c.1364C>A<br>(homozygous)<br>p.(Ala455Asp) | Missense         | Mother and father were heterozygous | Sporadic (Consanguinity)           | Absent                  | S : D<br>(0.005)<br>P : D<br>(0.898) | 8  | 4,068 | AG: 0 (17)<br>AL: 0 (47)<br>DG: 0 (16)<br>DL: 0 (2)         | 4 | CMD with cerebellar atrophy                               | x50 | Not done                                                       |
| I218 | M, 50y | FKRP                 | c.826C>A (homozygous)<br>p.(Leu276Ile)     | Missense         | Not tested                          | Sporadic                           | 0,003961/0.001104       | S : T<br>(0.065)<br>P : B (0.3)      | 5  | 2,015 | AG: 0 (4)<br>AL: 0 (16)<br>DG: 0 (2)<br>DL: 0 (-9)          | 4 | Severe LGMD                                               | UNK | Dystrophic pattern. IHC not done                               |
| I354 | F, <1y | FKRP                 | c.1384C>T<br>(homozygous)<br>p.(Pro462Ser) | Missense         | Mother and father were heterozygous | Sporadic<br>Familial consanguinity | 1.448e-05/<br>9.037e-06 | S : D (0)<br>P : D<br>(0.996)        | 10 | 3,891 | AG: 0 (27)<br>AL: 0 (-3)<br>DG: 0 (-2)<br>DL: 0 (-4)        | 4 | CMD                                                       | x30 | Dystrophic pattern. Absence of $\alpha$ -dystroglycan staining |
| I24  | M, 40y | GMPPB<br>NM_013334.3 | c.902C>G<br>p.(Ser301Cys)                  | Missense         | Mother not tested                   | Sporadic                           | Absent                  | S : D (0)<br>P : B<br>(0.152)        | 7  | 2,304 | AG: 0 (32)<br>AL: 0 (-5)<br>DG: 0 (-37)<br>DL: 0 (-41)      | 4 | LGMD                                                      | x10 | Dystrophic pattern                                             |
|      |        |                      | c.1069G>A<br>p.(Val357Ile)                 | Missense         | Present in father                   |                                    | 7.438e-05/<br>6.017e-05 | S : D (0)<br>P : D (1)               | 8  | 3,857 | AG: 0 (-38)<br>AL: 0.01 (36)<br>DG: 0.01 (9)<br>DL: 0 (-38) | 4 |                                                           |     |                                                                |
| I252 | F, <1y | LAMA2<br>NM_000426.3 | c.1884+1_1884+6del<br>(homozygous)         | Frameshift indel | Not tested                          | Sporadic                           | Absent                  |                                      | 10 | NA    | NA                                                          | 5 | Severe neonatal hypotonia                                 | x20 | Not done                                                       |
| I29  | M, 17y | LAMA2                | c.752T>C (homozygous)<br>p.(Leu251Pro)     | Missense         | Parents was heterozygous            | Sporadic                           | Absent                  | S : D (0)<br>P : D<br>(0.998)        | 10 | 4,006 | AG: 0 (-13)<br>AL: 0 (33)<br>DG: 0 (49)<br>DL: 0 (-34)      | 4 | CMD, intellectual deficiency and epilepsy                 | x50 | Dystrophic pattern. Absence of $\alpha$ -dystroglycan staining |
| I30  | M, 28y | LAMA2                | c.2461A>C<br>p.(Thr821Pro)                 | Missense         | Mother was heterozygous             | Sporadic                           | Absent                  | S : D<br>(0.002)<br>P : D<br>(0.998) | 10 | 3,853 | AG: 0 (-10)<br>AL: 0 (-18)<br>DG: 0 (-4)<br>DL: 0 (-19)     | 4 | LGMD                                                      | x10 | Dystrophic pattern. Normal IHC                                 |
|      |        |                      | c.3976C>T<br>p.(Arg1326*)                  | Nonsense         | Father was heterozygous             |                                    | Absent                  |                                      | 10 | 7,952 | AG: 0 (-10)<br>AL: 0 (-47)<br>DG: 0 (-47)<br>DL: 0 (15)     | 5 |                                                           |     |                                                                |
| I20  | F, 2y  | LMNA<br>NM_170707.3  | c.1357C>T<br>p.(Arg453Trp)                 | Missense         | <i>De novo</i> variant              | Sporadic                           | Absent                  | S : D (0)<br>P : D<br>(0.993)        | 9  | 4,613 | AG: 0 (40)<br>AL: 0 (-46)<br>DG: 0 (-25)<br>DL: 0 (23)      | 5 | CMD                                                       | x10 | Dystrophic pattern                                             |
| I207 | M, <1y | MTM1<br>NM_000252.2  | c.290G>A<br>p.(Gly97Glu)                   | Missense         | Mother was heterozygous             | Sporadic                           | Absent                  | S : D<br>(0.001)<br>P : D<br>(0.999) | 10 | 3,897 | AG: 0 (-14)<br>AL: 0 (16)<br>DG: 0 (47)<br>DL: 0 (-28)      | 4 | Severe neonatal hypotonia with Respiratory failure        | NI  | Not done                                                       |
| I7   | M, <1y | MTM1                 | c.519C>G<br>p.(Tyr173*)                    | Nonsense         | Not tested                          | Sporadic                           | Absent                  |                                      | 10 | 5,834 | AG: 0 (1)<br>AL: 0 (-49)<br>DG: 0.01 (5)<br>DL: 0 (9)       | 5 | Severe neonatal hypotonia with respiratory failure        | NI  | Centronuclear myopathy                                         |
| I40  | F, 48y | MTM1                 | c.1261-10A>G (ivs11)                       | Splicing         | Sister affected                     | X-Linked                           | Absent                  |                                      | 10 | 3,022 | AG: 0.93 (1)<br>AL: 0.86 (10)<br>DG: 0 (1)<br>DL: 0 (17)    | 4 | LGMD                                                      | x2  | Non-specific myogenic changes                                  |

|          |                  |                       |                                             |            |                              |                                                                     |                     |                                |    |       |                                                             |   |                                                      |     |                                                 |
|----------|------------------|-----------------------|---------------------------------------------|------------|------------------------------|---------------------------------------------------------------------|---------------------|--------------------------------|----|-------|-------------------------------------------------------------|---|------------------------------------------------------|-----|-------------------------------------------------|
| I195     | F, 56y           | MYH7<br>NM_000257.2   | c.5791-1G>T                                 | Splicing   | Present in mother            | Sporadic (the clinical examination of the mother was not available) | Absent              |                                | 10 | 5,392 | AG: 0.22 (29)<br>AL: 0.95 (-1)<br>DG: 0 (-13)<br>DL: 0 (-9) | 4 | Early onset cardiomyopathy and LGMD of adult onset   | UNK | Minicores                                       |
| I208     | M, 4y            | MYH7                  | c.5000T>C<br>p.(Leu1667Pro)                 | Missense   | De novo variant              | Sporadic                                                            | Absent              | S : D (0)<br>P : D (0.94)      | 10 | 4,225 | AG: 0 (18)<br>AL: 0 (-47)<br>DG: 0 (-1)<br>DL: 0 (-4)       | 4 | CM                                                   | NI  | Minicores                                       |
| I36, I37 | M, 40y           | MYH7                  | c.4795A>C<br>p.(Thr1599Pro)                 | Missense   | Present in affected daughter | AD                                                                  | Absent              | S : D (0.001)<br>P : P (0.653) | 10 | 3,461 | AG: 0 (-16)<br>AL: 0 (0)<br>DG: 0 (19)<br>DL: 0 (-44)       | 4 | Distal myopathy                                      | x5  | Non-specific myogenic pattern IHC study: normal |
| I62      | F, 50y           | MYOT<br>NM_006790     | c.179C>G<br>p.(Ser60Cys)                    | Missense   | Present in affected brother  | Affected brother                                                    | Absent              | S : D (0.004)<br>P : D (0.894) | 5  | 3,687 | AG: 0 (-49)<br>AL: 0 (47)<br>DG: 0 (-1)<br>DL: 0 (-40)      | 4 | Distal myopathy                                      | x2  | Non-specific myogenic pattern IHC study: normal |
| I353     | M, 19y           | NEB<br>NM_001271208.1 | c.2835+5G>A                                 | Splicing   | Present in mother            | Sporadic                                                            | Absent              |                                | 10 | 3,159 | AG: 0 (-19)<br>AL: 0 (25)<br>DG: 0 (26)<br>DL: 0.83 (5)     | 4 | CM                                                   | NI  | Rods                                            |
|          |                  |                       | c.15178delC<br>p.(His5060Thrfs*11)          | Frameshift | Father not tested            |                                                                     | Absent              |                                | 10 | NA    | AG: 0.02 (-24)<br>AL: 0 (39)<br>DG: 0.05 (45)<br>DL: 0 (39) | 5 |                                                      |     |                                                 |
| I76, I77 | M, 54y<br>F, 50y | NEB                   | c.21928T>C<br>p.(Ser7310Pro)                | Missense   | Father not tested            | AR (one affected sister)                                            | Absent              | S : T (0.114)<br>P : P (0.653) | 3  | 3,876 | AG: 0 (-43)<br>AL: 0 (12)<br>DG: 0.01 (-43)<br>DL: 0 (-17)  | 4 | Distal myopathy                                      | NI  | Non-specific myopathic changes                  |
|          |                  |                       | c.8860del<br>p.(Ala2954Profs*8)             | Frameshift | Mother was heterozygous      |                                                                     | Absent              |                                | 10 | NA    | AG: 0 (-29)<br>AL: 0 (28)<br>DG: 0 (-6)<br>DL: 0.04 (-29)   | 5 |                                                      |     |                                                 |
| I173     | F, 16y           | NEB                   | c.5039G>A<br>p.(Tyr1680Cys)                 | Missense   | Father was heterozygous      | Sporadic                                                            | Absent              | S : D (0)<br>P : D (0.999)     | 7  | 4,135 | AG: 0.02 (-30)<br>AL: 0 (7)<br>DG: 0 (-21)<br>DL: 0 (3)     | 3 | CM                                                   | NI  | Rods                                            |
|          |                  |                       | c.17541dupA<br>p.(Tyr5848Ilefs*15)          | Frameshift | Mother was Heterozygous      |                                                                     | Absent              |                                | 10 | 6,815 | AG: 0 (5)<br>AL: 0 (23)<br>DG: 0 (0)<br>DL: 0 (1)           | 5 |                                                      |     |                                                 |
| I112     | M, 60y           | NEB                   | c.21790G>C<br>p.(Asp7264His)                | Missense   | Parents not tested           | Sporadic                                                            | 0.001906/0.001829   | S : D (0.001)<br>P : D (0.897) | 6  | 4,263 | AG: 0 (-22)<br>AL: 0 (-1)<br>DG: 0 (-38)<br>DL: 0 (-50)     | 4 | Distal myopathy                                      | NI  | Non-specific myopathic changes                  |
|          |                  |                       | c.194C>T<br>p.(Pro65Leu)                    | Missense   |                              |                                                                     | 14.12e-05/11.77e-05 | S : D (0)<br>P : B (0.32)      | 4  | 2,865 | AG: 0 (1)<br>AL: 0 (42)<br>DG: 0 (1)<br>DL: 0 (-16)         | 3 |                                                      |     |                                                 |
| I1       | M, <1y           | NEB                   | c.6075+5G>A                                 | Splicing   | Present in father            | Sporadic                                                            | Absent              |                                | 10 | 4,228 | AG: 0 (-34)<br>AL: 0 (-6)<br>DG: 0.92 (-46)<br>DL: 0.96 (5) | 4 | Severe neonatal hypotonia and distal arthrogryposis. | NI  | Rods                                            |
|          |                  |                       | c.13661_13666delinsA<br>p.(Ser4554Asnfs*10) | Frameshift | Present in mother            |                                                                     | Absent              |                                | 10 | NA    | NA                                                          | 5 |                                                      |     |                                                 |
| I67      | F, 1y            | NEB                   | c.23998dupG<br>p.(Glu8000Glyfs*11)          | Frameshift | Father was heterozygous      | Sporadic                                                            | Absent              |                                | 10 | NA    | AG: 0 (44)<br>AL: 0 (-41)<br>DG: 0 (-26)<br>DL: 0.16 (-35)  | 4 | Severe neonatal hypotonia with                       | NI  | Non-specific myopathic changes                  |

|      |        |                           |                                 |                                      |                            |                         |                         |                                      |    |       |                                                              |   |                                                                                      |    |                                                      |
|------|--------|---------------------------|---------------------------------|--------------------------------------|----------------------------|-------------------------|-------------------------|--------------------------------------|----|-------|--------------------------------------------------------------|---|--------------------------------------------------------------------------------------|----|------------------------------------------------------|
|      |        |                           | c.518delA<br>p.(Lys173Serfs*55) | Frameshift                           | Mother was<br>heterozygous |                         | Absent                  |                                      | 10 | NA    | AG: 0.02 (-2)<br>AL: 0 (46)<br>DG: 0 (-2)<br>DL: 0 (11)      | 5 | respiratory<br>failure.                                                              |    |                                                      |
| I604 | M, 7Y  | NEB                       | c.8889+1G>A                     | Splicing                             | Father was<br>heterozygous | Sporadic                | Absent                  |                                      | 10 | 5,898 | AG: 0 (0)<br>AL: 0 (35)<br>DG: 0 (-25)<br>DL: 0.99 (1)       | 4 | Severe<br>neonatal<br>hypotonia with<br>respiratory<br>failure and<br>arthrogryposis | x2 | Rods                                                 |
|      |        |                           | c.8038C>T<br>p.(Arg2680*)       | Nonsense                             | Mother was<br>heterozygous |                         | Absent                  |                                      | 10 | 7,495 | AG: 0 (-39)<br>AL: 0 (15)<br>DG: 0 (-33)<br>DL: 0 (-13)      | 5 |                                                                                      |    |                                                      |
| I14  | F, 75y | PABPN1<br>NM_004643<br>.3 | c.30_32dup<br>p.(Ala11dup)      | Trinucleoti<br>d repeat<br>expansion | Not tested                 | Sporadic                |                         |                                      |    | 2,144 | NA                                                           | 4 | LGMD with<br>axial weakness                                                          | NI | Myofibrillar<br>aspect<br>with<br>rimmed<br>vacuoles |
| I5   | M, <1y | RYR1<br>NM_000540<br>.2   | c.11186T>C<br>p.(Met3729Thr)    | Missense                             | Parents not<br>tested      | Sporadic                | Absent                  | S : D<br>(0.021)<br>P : D<br>(0.946) | 9  | 3,832 | AG: 0 (-44)<br>AL: 0 (8)<br>DG: 0 (7)<br>DL: 0 (-24)         | 4 | Distal<br>arthrogryposis.<br>Neonatal death                                          | NI | Cores                                                |
|      |        |                           | c.11122A>C<br>p.(Thr3708Pro)    | Missense                             |                            |                         | Absent                  | S : T<br>(0.157)<br>P : P<br>(0.876) | 7  | 4     | AG: 0 (19)<br>AL: 0 (-35)<br>DG: 0 (-23)<br>DL: 0 (19)       | 4 |                                                                                      |    |                                                      |
| I42  | F, 11y | RYR1                      | c.38T>C<br>p.(Leu13Pro)         | Missense                             | Mother was<br>heterozygous | Sporadic                | Absent                  | S : D<br>(0.023)<br>P : D (1)        | 9  | 4,104 | AG: 0 (7)<br>AL: 0 (-24)<br>DG: 0 (-11)<br>DL: 0 (7)         | 4 | CM                                                                                   | NI | Non-specific<br>myopathic<br>changes                 |
|      |        |                           | c.7628C>T<br>p.(Thr2543Ile)     | Missense                             | Mother was<br>heterozygous |                         | Absent/<br>3.190 e-05   | S : T<br>(0.09)<br>P : P<br>(0.506)  | 6  | 2,996 | AG: 0.06 (-2)<br>AL: 0 (-8)<br>DG: 0 (-2)<br>DL: 0 (1)       | 3 |                                                                                      |    |                                                      |
|      |        |                           | c.13690C>T<br>p.(Arg4564Trp)    | Missense                             | Father was<br>heterozygous |                         | 4.118e-05/<br>3.579e-05 | S : D (0)<br>P : D<br>(0.997)        | 9  | 4,097 | AG: 0 (-24)<br>AL: 0 (-30)<br>DG: 0 (-2)<br>DL: 0 (46)       | 3 |                                                                                      |    |                                                      |
| I220 | M, 3y  | RYR1                      | c.14762T>C<br>p.(Phe4921Ser)    | Missense                             | De novo variant            | Sporadic                | Absent                  | S : D (0)<br>P : D<br>(0.994)        | 9  | 4,335 | AG: 0 (-5)<br>AL: 0 (-20)<br>DG: 0 (-43)<br>DL: 0 (-20)      | 5 | CM                                                                                   | NI | Non-specific<br>myopathic<br>changes                 |
| I175 | F,10y  | RYR1                      | c.12727G>A<br>p.(Glu4243Lys)    | Missense                             | De novo variant            | Sporadic                | Absent                  | S : D<br>(0.02)<br>P : D (1)         | 9  | 4,183 | AG: 0 (3)<br>AL: 0 (9)<br>DG: 0 (8)<br>DL: 0 (-28)           | 4 | CM                                                                                   | NI | Non-specific<br>myopathic<br>changes                 |
| I176 | M, <1y | RYR1                      | c.5926C>T<br>p.(Arg1976Cys)     | Missense                             | Present in<br>mother       | Sporadic                | Absent                  | S : D (0)<br>P : D (1)               | 8  | 3,999 | AG: 0 (22)<br>AL: 0 (-6)<br>DG: 0 (-2)<br>DL: 0 (2)          | 4 | Severe<br>neonatal<br>hypotonia                                                      | NI | Non-specific<br>myopathic<br>changes                 |
|      |        |                           | c.10649G>C<br>p.(Arg3550Pro)    | Missense                             | Present in<br>father       |                         | Absent                  | S : D (0)<br>P : D (1)               | 8  | 3,809 | AG: 0 (-22)<br>AL: 0 (19)<br>DG: 0.03<br>(37)<br>DL: 0 (-5)  | 4 |                                                                                      |    |                                                      |
| I155 | F, 51y | RYR1                      | c.6697T>C<br>p.(Cys2233Arg)     | Missense                             | Parents not<br>tested      | AD<br>(affected<br>son) | Absent                  | S : D<br>(0.001)<br>P : D<br>(0.996) | 9  | 0,025 | AG: 0 (1)<br>AL: 0 (-37)<br>DG: 0 (14)<br>DL: 0 (-23)        | 5 | CM                                                                                   | NI | NI                                                   |
| I519 | F, 26y | RYR1                      | c.10348-6C>G                    | Splicing                             | Father not<br>tested       | Sporadic                | 2.475e-05/<br>3.182e-05 |                                      | 10 | 0,45  | AG: 0 (-41)<br>AL: 0.47 (6)<br>DG: 0 (35)<br>DL: 0 (15)      | 5 | CM                                                                                   | NI | Non-specific<br>myopathic<br>changes                 |
|      |        |                           | c.14172+4A>G                    | Splicing                             | Present in<br>mother       |                         | 8.245e-06/<br>7.958e-06 |                                      | 10 | 2,34  | AG: 0 (50)<br>AL: 0 (-46)<br>DG: 0.01 (-20)<br>DL: 0.08 (-4) | 4 |                                                                                      |    |                                                      |

|      |         |                       |                                                    |                   |                                     |                                    |                          |                                      |    |       |                                                               |   |                                                             |     |                                                               |
|------|---------|-----------------------|----------------------------------------------------|-------------------|-------------------------------------|------------------------------------|--------------------------|--------------------------------------|----|-------|---------------------------------------------------------------|---|-------------------------------------------------------------|-----|---------------------------------------------------------------|
| I526 | M, 8y   | RYR1                  | c.1205T>C<br>p.(Met402Thr)                         | Missense          | Mother was heterozygous             | Sporadic                           | 8.245e-06/<br>3.97e-06   | S : D<br>(0.003)<br>P : P<br>(0.73)  | 8  | 2,684 | AG: 0 (1)<br>AL: 0 (10)<br>DG: 0 (-4)<br>DL: 0 (39)           | 5 | CM                                                          | NI  | Minicores                                                     |
|      |         |                       | c.10496dupG<br>p.(Arg3499fs)                       | Frameshift delins | Father not tested                   |                                    | Absent/<br>4.06e-06      |                                      | 10 | 5,692 | AG: 0 (23)<br>AL: 0 (-22)<br>DG: 0 (9)<br>DL: 0 (-22)         | 5 |                                                             |     |                                                               |
| I152 | M, 35 y | RYR1                  | c.6617C>T<br>(homozygous)<br>p.(Thr2206Met)        | Missense          | Parents not tested                  | Affected sister                    | 3.305e-05/<br>2.123e-05  | S : D (0)<br>P : D<br>(0.998)        | 9  | 3,864 | AG: 0 (-1)<br>AL: 0 (-48)<br>DG: 0 (35)<br>DL: 0 (10)         | 4 | LGMD                                                        | x20 | Non-specific myopathic changes                                |
| I46  | M, 60 y | RYR1                  | c.4711A>G<br>p.(Ile1571Val)                        | Missense          | Parents not tested                  | Sporadic                           | 0.001339 / 8.<br>548e-04 | S : T<br>(0.729)<br>P : D<br>(0.978) | 6  | 1,318 | AG: 0 (-3)<br>AL: 0 (16)<br>DG: 0 (30)<br>DL: 0 (10)          | 4 | Proximal and distal weakness                                | UNK | Myofibrillar aspects                                          |
|      |         |                       | c.10097G>A<br>p.(Arg3366His)                       | Missense          |                                     |                                    | 9.272e-04/<br>8.605e-04  | S : D<br>(0.006)<br>P : D<br>(0.997) | 7  | 2,753 | AG: 0.01 (5)<br>AL: 0 (17)<br>DG: 0 (7)<br>DL: 0 (-5)         | 4 |                                                             |     |                                                               |
|      |         |                       | c.11798A>G<br>p.(Tyr3933Cys)                       | Missense          |                                     |                                    | 9.233e-04/<br>8,487e-04  | S : D (0)<br>P : D<br>(0.997)        | 9  | 4,166 | AG: 0 (-50)<br>AL: 0 (-8)<br>DG: 0 (14)<br>DL: 0 (3)          | 4 |                                                             |     |                                                               |
|      |         |                       | c.7028-10G>A                                       | Splicing          |                                     |                                    | Absent/<br>1,864e-05     |                                      | 10 | 2,885 | AG: 1 (2)<br>AL: 0.97<br>(10)<br>DG: 0 (41)<br>DL: 0 (9)      | 5 |                                                             |     |                                                               |
| I28  | F, 14y  | SGCA<br>NM_000023.2   | c.850C>T (homozygous)<br>p.(Arg284Cys)             | Missense          | Mother and father were heterozygous | AR Consanguinity (Affected sister) | 1.237e-04/<br>1.485e-04  | S : D (0)<br>P : D<br>(0.995)        | 9  | 4,412 | AG: 0 (-13)<br>AL: 0 (-9)<br>DG: 0 (0)<br>DL: 0 (11)          |   | Exercise intolerance                                        | x40 | Dystrophic pattern. Normal IHC                                |
| I31  | M, 15y  | SGCG<br>NM_000231.2   | c.800_801del<br>(homozygous)<br>p.(Cys267Serfs*51) | Frameshift        | Parents were heterozygous           | Sporadic                           | Absent                   |                                      | 10 | 4,452 | AG: 0 (-22)<br>AL: 0 (13)<br>DG: 0 (41)<br>DL: 0 (0)          | 5 | LGMD                                                        | x50 | Dystrophic pattern. Absence of $\gamma$ -sarcoglycan staining |
| I427 | M, 20y  | STIM1<br>NM_003156.3  | c.910C>T<br>p.(Arg304Trp*)                         | Nonsense          | Not tested                          | Sporadic                           | Absent                   | S : D<br>(0.001)<br>P : D<br>(0.998) | 8  | 3,912 | AG: 0 (15)<br>AL: 0 (-24)<br>DG: 0 (-2)<br>DL: 0 (6)          | 5 | Features of Stormorken syndrome: myalgia, headaches, myosis | x30 | Tubular aggregates                                            |
| I26  | M, 14y  | TTN<br>NM_001267550.1 | c.51437-4_51444del                                 | Frameshift delins | Not feasible (adopted child)        | Sporadic                           | Absent                   |                                      | 10 | NA    | NA                                                            | 4 | CM                                                          | NI  | Centronuclear myopathy                                        |
|      |         |                       | c.26503A>T<br>p.(Lys8835*)                         | Nonsense          |                                     |                                    | Absent                   |                                      | 10 | 9,482 | AG: 0 (32)<br>AL: 0.02<br>(20)<br>DG: 0 (20)<br>DL: 0 (-48)   | 5 |                                                             |     |                                                               |
| I398 | F, 10y  | TTN                   | c.56648-1G>A                                       | Splicing          | Mother was heterozygous             | Sporadic                           | 9.008e-06/<br>5.321e-06  |                                      | 10 | 5,739 | AG: 0.11 (-19)<br>AL: 0.99 (-1)<br>DG: 0 (-13)<br>DL: 0 (-38) | 4 | CM with arthrogryposis and rigid spine                      | NI  | Cores                                                         |
|      |         |                       | c.40011delA<br>p.(Lys13337fs)                      | Frameshift        | Father was heterozygous             |                                    | Absent                   |                                      | 10 | NA    | AG: 0 (37)<br>AL: 0 (38)<br>DG: 0.1 (-46)<br>DL: 0 (9)        | 5 |                                                             |     |                                                               |

|           |        |                   |                                               |                                         |                                            |                             |           |                              |     |       |                                                           |   |                                                    |    |                                            |
|-----------|--------|-------------------|-----------------------------------------------|-----------------------------------------|--------------------------------------------|-----------------------------|-----------|------------------------------|-----|-------|-----------------------------------------------------------|---|----------------------------------------------------|----|--------------------------------------------|
| I47       | F, 44y | TTN               | c.65575+2T>G                                  | Splicing                                | Mother was heterozygous, father not tested | Sporadic                    | Absent    |                              | 10  | 5,014 | AG: 0 (7)<br>AL: 0 (22)<br>DG: 0.02 (-30)<br>DL: 1 (2)    | 5 | CM                                                 | NI | Excessive internal nuclei.                 |
|           |        |                   | c.68029A>G p.(Thr22677Ala)                    | Missense Predicted to affect splicing   | Absent in mother, father not tested        |                             | Absent    | S: D (0.012)<br>P: P (0.622) | 4.4 | 2,467 | AG: 0 (-16)<br>AL: 0 (-18)<br>DG: 0 (-40)<br>DL: 0 (38)   | 4 |                                                    |    |                                            |
| I42, I162 | F, 40y | TTN               | c.1662+15_3101-3del                           | CNV                                     | Affected mother was heterozygous           | AD                          | Absent    |                              |     | NA    | NA                                                        | 5 | Distal Myopathy                                    | x2 | Minicores                                  |
| I420      | M, 56y | TTN               | c.35713+1del                                  | Splicing                                | Not tested                                 | Affected brother and sister | 5.58 e-05 |                              | 10  | 5,074 | AG: 0 (-24)<br>AL: 0 (22)<br>DG: 0.08 (2)<br>DL: 0.98 (1) | 4 | LGMD with cardiomyopathy                           | x5 | Myofibrillar features                      |
|           |        |                   | c.7120C>T p.(Gln2374*)                        | Nonsense                                |                                            |                             | Absent    |                              | 10  | 7,175 | AG: 0 (-3)<br>AL: 0 (38)<br>DG: 0 (22)<br>DL: 0 (18)      | 5 |                                                    |    |                                            |
| I74, I73  | F, 4y  | TTN               | c.106531G>C; p.(Ala35511Pro)                  | Missense (predicted to affect splicing) | Present in father                          | AR (one affected sister)    | Absent    | UNK                          | 10  | 5,054 | AG: 0 (0)<br>AL: 0 (50)<br>DG: 0 (-4)<br>DL: 0.62 (0)     | 5 | CM                                                 | NI | Centronuclear myopathy                     |
|           |        |                   | c.105036C>A p.(Tyr35012*)                     | Nonsense                                | Present in mother                          |                             | Absent    |                              | 10  | 15,61 | AG: 0 (-25)<br>AL: 0 (9)<br>DG: 0 (-25)<br>DL: 0 (-6)     | 5 |                                                    |    |                                            |
| I401      | F, 1y  | TNNT1 NM_003283.5 | c.192+244_388-1191del (del<8-9>) (homozygous) | In Frame CNV deletion                   | Father and mother heterozygous             | Sporadic                    | Absent    |                              | 10  | NA    | NA                                                        | 4 | Severe neonatal hypotonia                          | NI | Rods                                       |
| I72       | F, 11y | TNNT1             | c.200A>G p.(His67Arg)                         | Missense                                | De novo variant                            | Sporadic                    | Absent    | S: D (0.002)<br>P: B (0.22)  | 7   | 3,721 | AG: 0.01 (42)<br>AL: 0 (7)<br>DG: 0 (-49)<br>DL: 0 (-2)   | 4 | Neonatal hypotonia                                 | NI | Excessive internal nuclei. Absence of rods |
| I60       | M, 50y | TRIP4             | del <8-9> (homozygous)                        | In Frame CNV deletion                   | Absent in two sister and one brother       | Sporadic Consanguinity      | Absent    |                              |     | NA    | NA                                                        | 4 | Congenital myopathy with late onset cardiomyopathy | NI | Rods                                       |

AD: Autosomal Dominant; AR: Autosomal Recessive; CM: Congenital myopathy; LGMD: Limb girdle muscular dystrophy; CK: Creatin Kinase; Unknown: UNK; ND: Not done; NA : Not Applicable; IHC: Immunohistochemical; S: SIFT; P: POLYPHEN2; CNV: Copy number variation; D: Deleterious; P: Pathogenic; B: Benign; T: Tolerated; Splice AI – AG: Acceptor Gain AL: Acceptor Loss DG: Donor Gain DL: Donor Loss (distance in bp)
